# Supplementary material for: Reviving the pedagogy of philosophical inquiry in Muslim curriculum for effective civilizational dialogue
Source: Royal Society of Chemistry journal article supplement (doi:10.1039/d1ra06494k), 2010-01-01
Supplement: d1ra06494k1.pdf [file d1ra06494k1.pdf]

## Supporting Information

### **NIR luminescent detection of quercetin based on an octanuclear**

### **Zn(II)-Nd(III) salen nanocluster**

**Mengyu Niu, Xiaoping Yang,\* Yanan Ma, Chengri Wang, and Desmond Schipper**

### **Contents**

|                                                                           |     |
|---------------------------------------------------------------------------|-----|
| 1. Synthesis of H <sub>4</sub> L .....                                    | S2  |
| 2. <sup>1</sup> H NMR spectrum of H <sub>4</sub> L.....                   | S2  |
| 3. IR spectra of H <sub>4</sub> L and <b>1</b> .....                      | S3  |
| 4. Powder XRD patterns of <b>1</b> .....                                  | S3  |
| 5. The thermogravimetric analysis of <b>1</b> .....                       | S4  |
| 6. The <sup>1</sup> H NMR spectrum of the Zn-La analogue.....             | S4  |
| 7. The mass spectrum of <b>1</b> .....                                    | S5  |
| 8. UV-Vis spectra of H <sub>4</sub> L and <b>1</b> .....                  | S5  |
| 9. The emission lifetime of <b>1</b> .....                                | S6  |
| 10. Chemical structures of Que and biomolecules.....                      | S7  |
| 11. NIR luminescent sensing of <b>1</b> towards Que and biomolecules..... | S8  |
| 12. The visible emission response of <b>1</b> to Que .....                | S10 |
| 13. X-Ray Crystallography .....                                           | S11 |

## 1. Synthesis of H<sub>4</sub>L

**H<sub>4</sub>L** 2,3-Dihydroxybenzaldehyde (20.0 mmol, 2.7624 g) was dissolved in 15 mL EtOH, and a solution of 4-methoxy-*o*-phenylenediamine (10.0 mmol, 1.3817 g) in 20 mL EtOH was then added drop by drop. The resulting solution was stirred and heated under reflux for 5 h. It was allowed to cool and was then filtered. The solid was washed with EtOH (3 × 5 mL) and then dried in the air at room temperature to give red product. Yield (based on 4-Methoxy-*O*-Phenylenediamine): 3.630g (96%). Elemental analysis: Found: C, 66.63%; H, 4.77%; N, 7.43%; Calc. For C<sub>21</sub>H<sub>18</sub>N<sub>2</sub>O<sub>5</sub>: C, 66.66%; H, 4.79%; N, 7.40%. <sup>1</sup>H NMR (500 MHz, DMSO): 12.86 (2H), 9.22 (2H), 8.88 (2H), 7.46 (1H), 6.77 (2H), 6.92 (4H), 7.09 (2H), 3.87 (3H). IR (cm<sup>-1</sup>): 1615 (m), 1456 (m), 1270 (m), 1158 (s), 1073 (s), 972 (w), 775 (m), 716(s) , 623(m).

## 2. The <sup>1</sup>H NMR spectrum of H<sub>4</sub>L

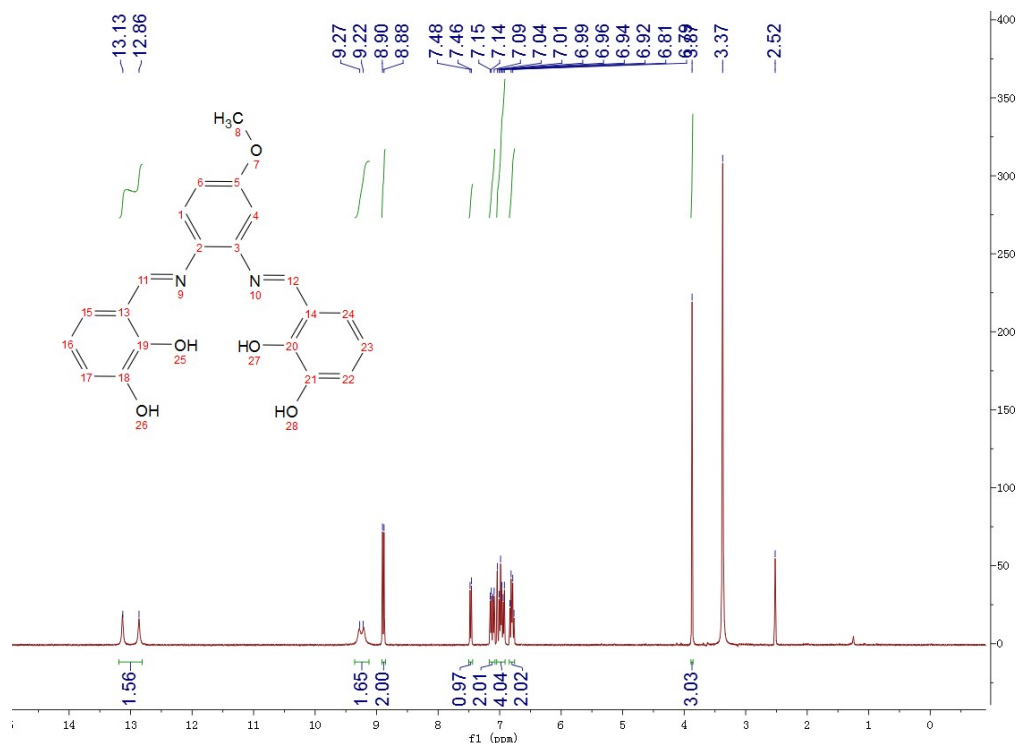

Figure S1. <sup>1</sup>H NMR spectrum of H<sub>4</sub>L.

### 3. IR spectra of H<sub>4</sub>L and 1

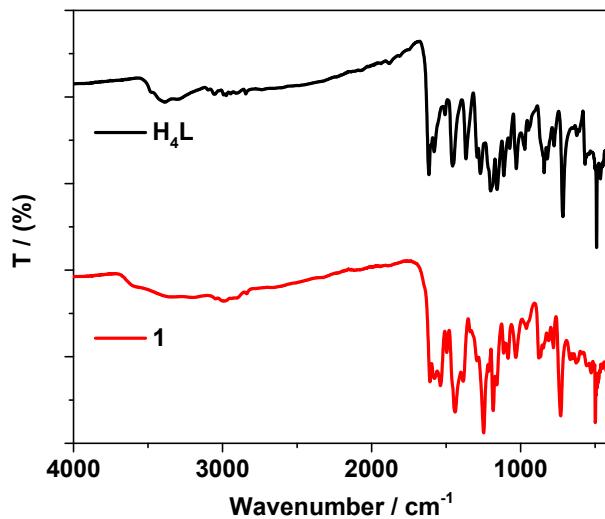

Figure S2. IR spectra of H<sub>4</sub>L and 1.

### 4. Powder XRD patterns of 1

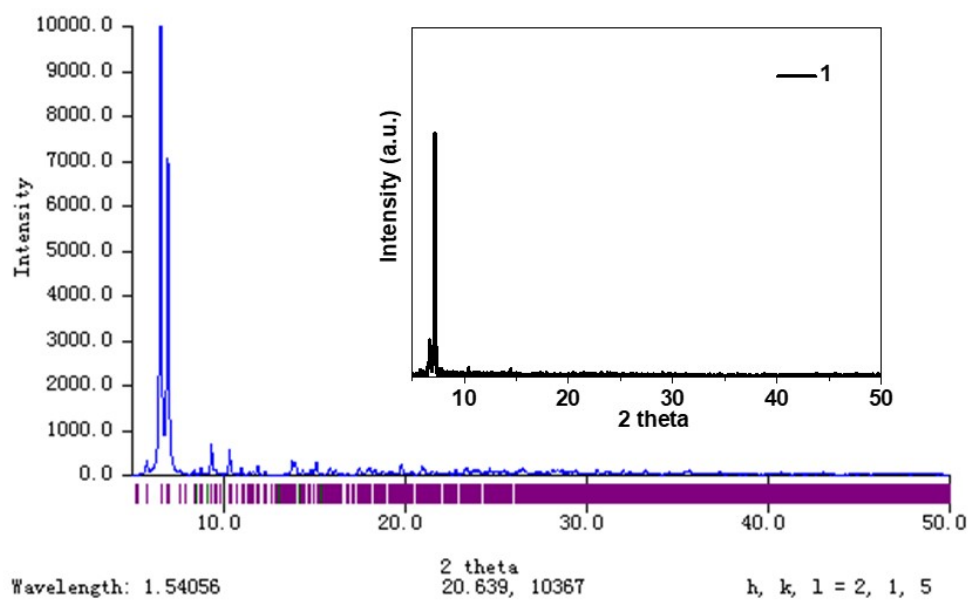

Figure S3. Powder XRD patterns of 1.

## 5. The thermogravimetric analysis of 1

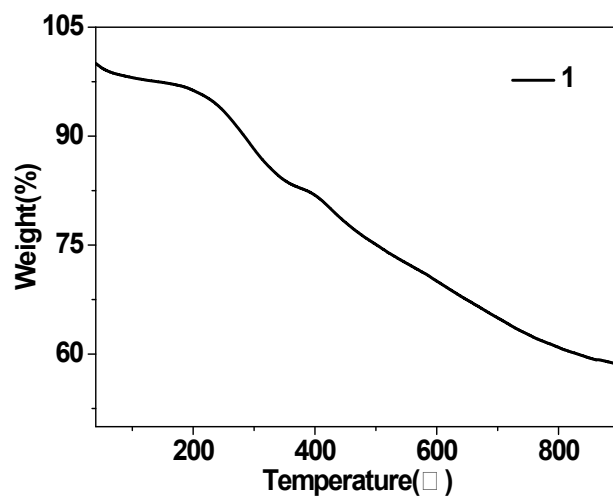

**Figure S4.** The thermogravimetric analysis of 1.

## 6. The $^1\text{H}$ NMR spectrum of the Zn-La analogue

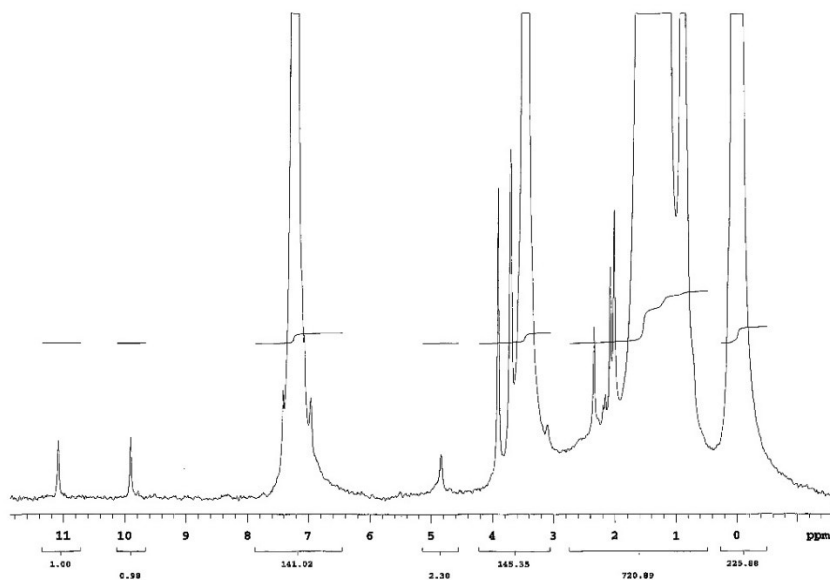

**Figure S5.** The  $^1\text{H}$  NMR spectrum of the Zn-La analogue in  $\text{CD}_3\text{OD}$ .

## 7. The mass spectrum of **1**

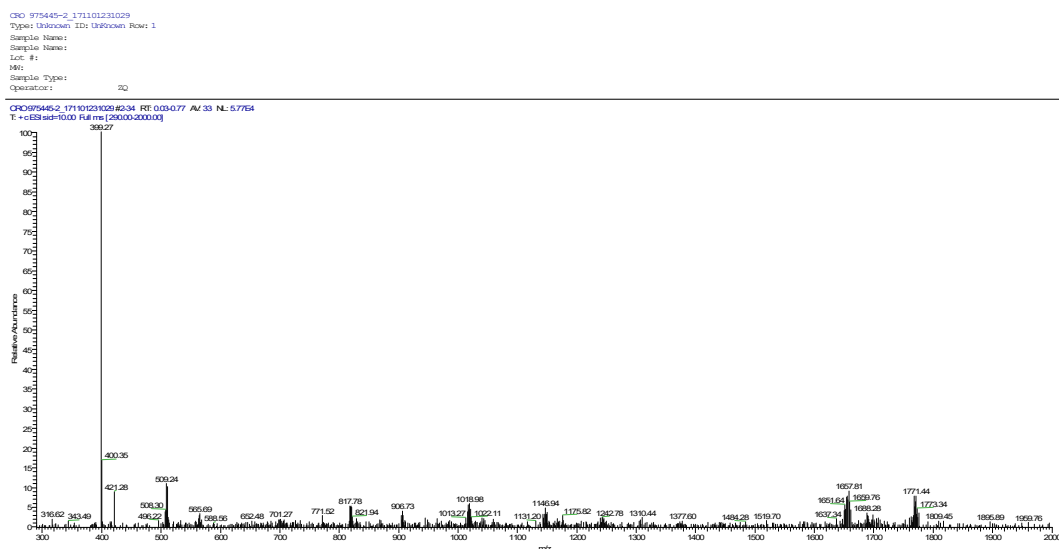

**Figure S6.** The mass spectrum (ESI) of **1** in MeOH.

## 8. UV-vis spectra of H<sub>4</sub>L and **1**

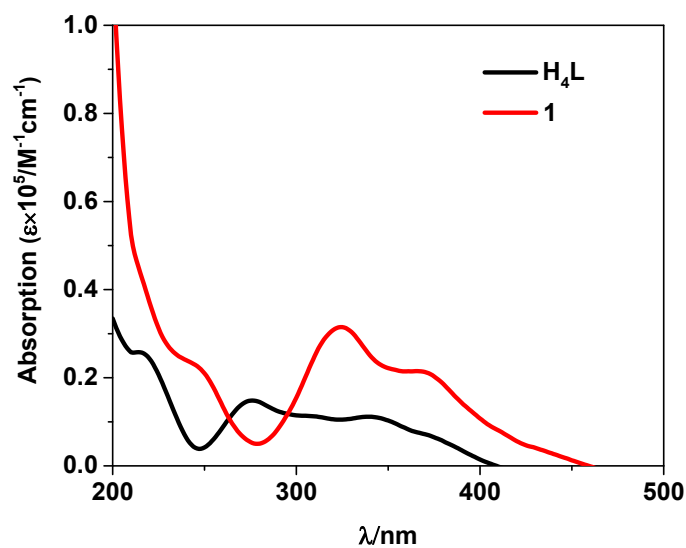

**Figure S7.** UV-vis absorption spectra of H<sub>4</sub>L and **1** in CH<sub>3</sub>CN ( $C = 10^{-6}$  mol/L).

## 9. The NIR luminescence lifetime of **1**

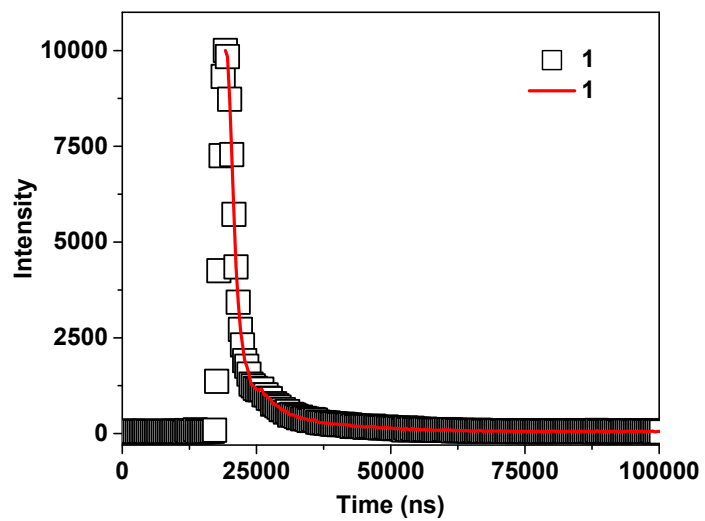

**Figure S8.** The NIR luminescence lifetime of **1** ( $30 \mu\text{M}$ ) in  $\text{CH}_3\text{CN}$ .

## 10. Chemical structures of Que and biomolecules

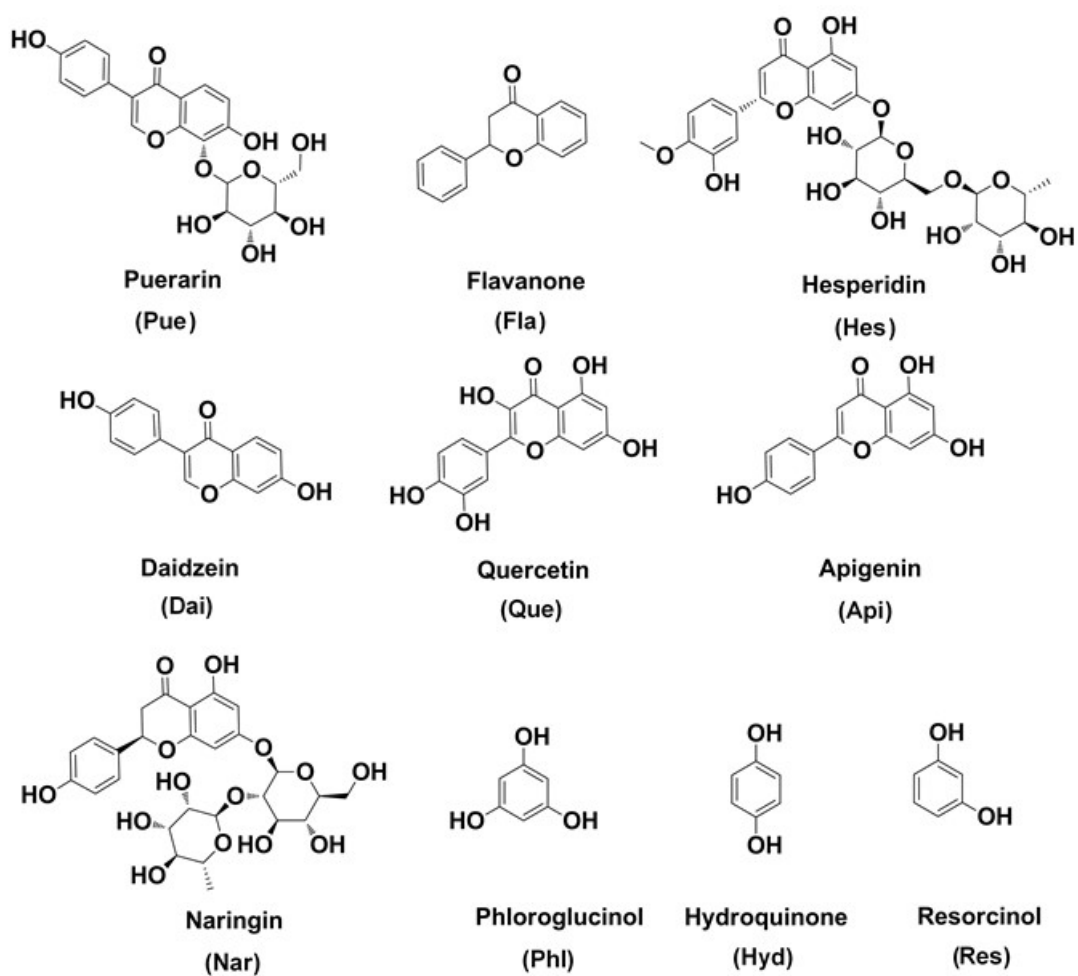

**Scheme S1.** Chemical structures of Que and biomolecules.



## 11. NIR luminescent sensing of 1 to Que and biomolecules

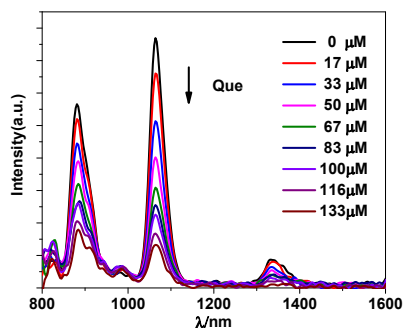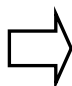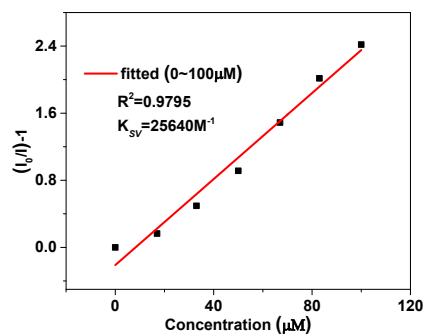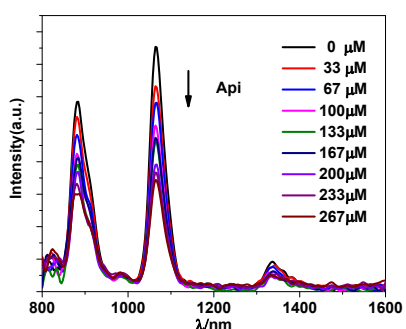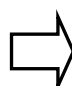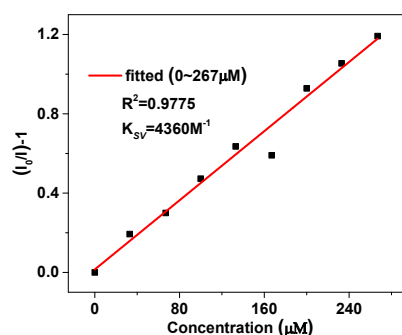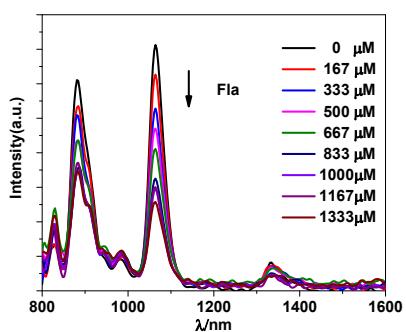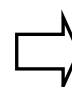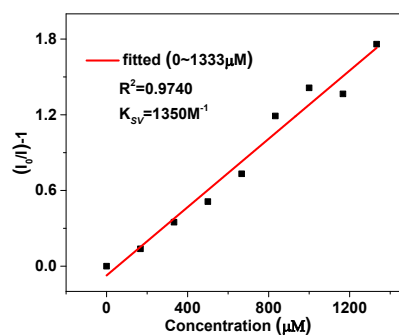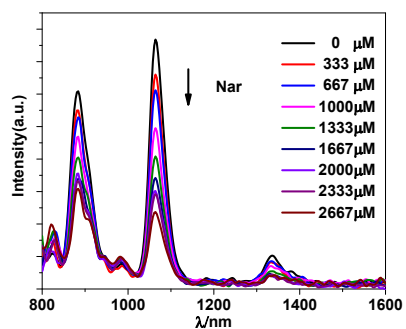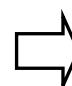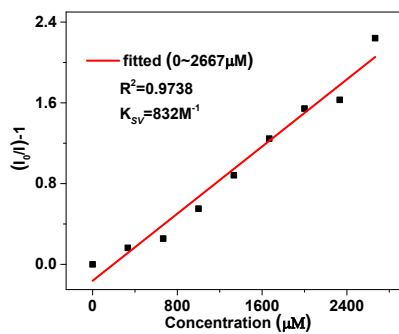

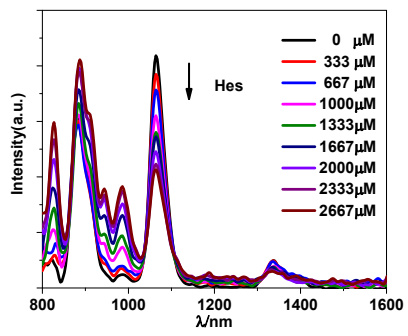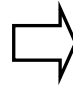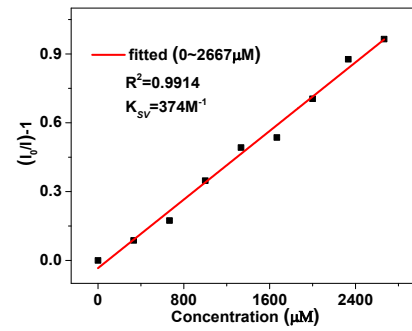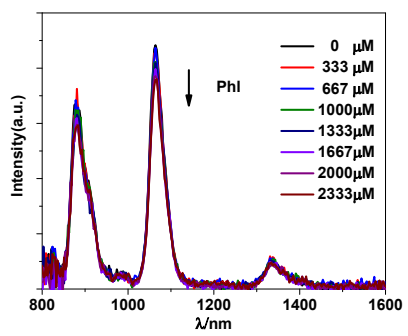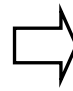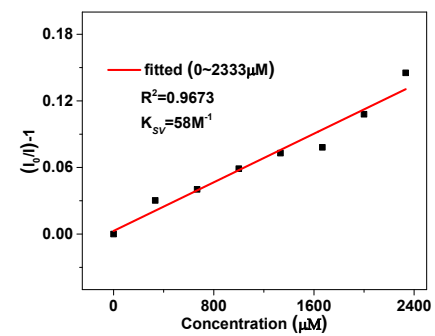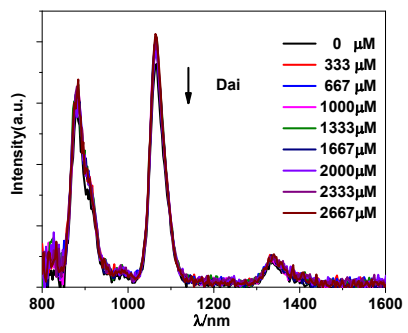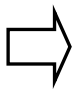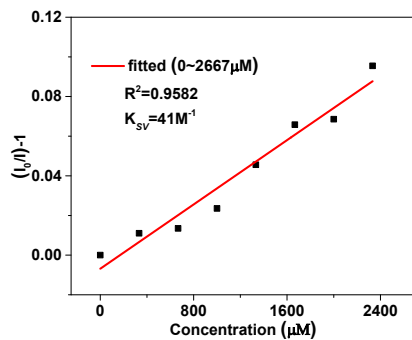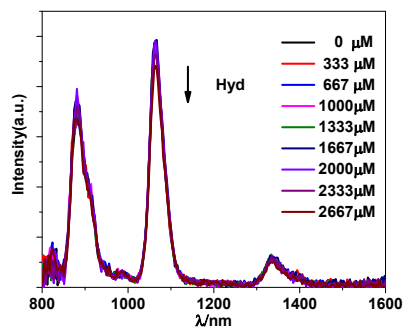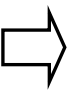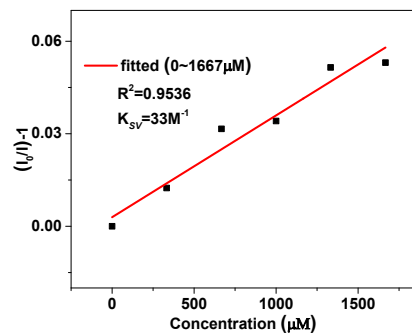

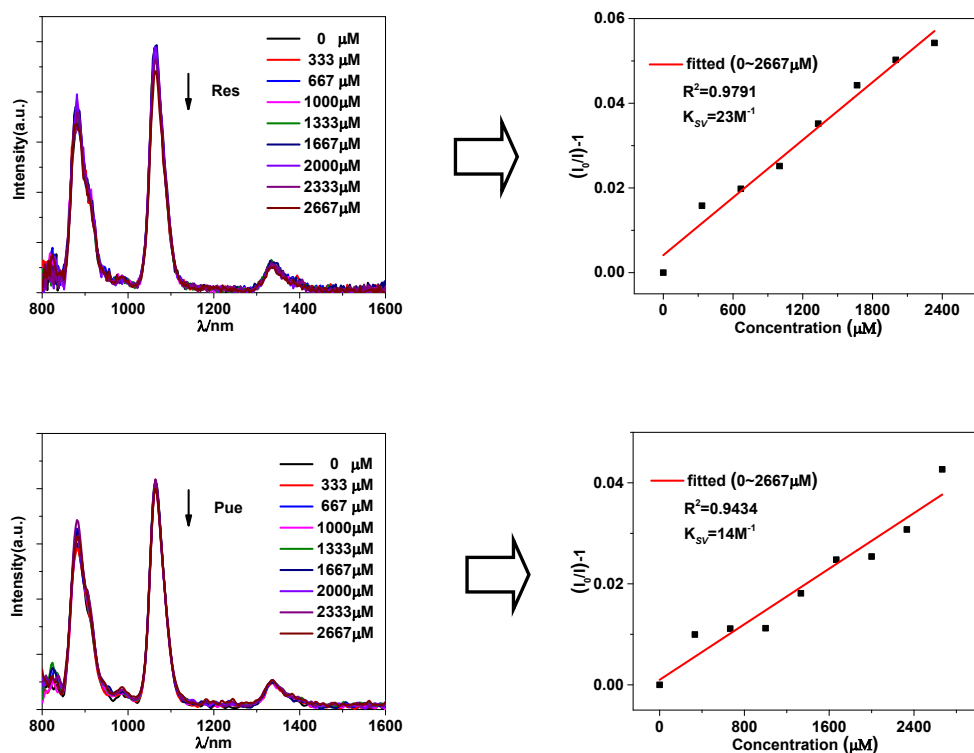

**Figure S9.** NIR luminescent sensing of **1** ( $30 \mu\text{M}$ ) to Que and biomolecules in  $\text{CH}_3\text{CN}$  ( $\lambda_{\text{ex}} = 370 \text{ nm}$ ).

## 12. The visible emission response of **1** to Que

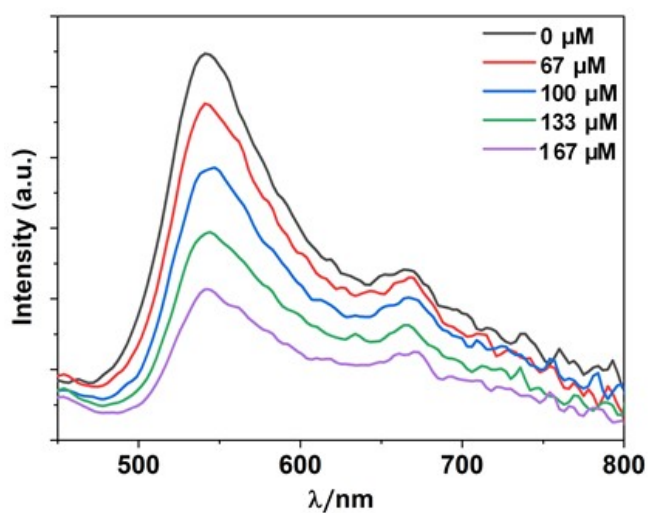

**Figure S10.** The quenching of visible ligand-centered emission of **1** ( $30 \mu\text{M}$ ) to the addition of Que with different concentrations in  $\text{CH}_3\text{CN}$ .

### 13. X-Ray Crystallography

**Table S1.** Selected bond lengths (Å) and angles (°) for **1**.

|             |           |                   |          |
|-------------|-----------|-------------------|----------|
| Nd(1)-O(22) | 2.28(3)   | Zn(6)-O(17)       | 1.98(2)  |
| Nd(1)-O(6)  | 2.31(2)   | Zn(6)-O(21)       | 1.98(2)  |
| Nd(1)-O(20) | 2.34(2)   | Zn(6)-N(8)        | 2.07(3)  |
| Nd(1)-O(7)  | 2.355(18) | Zn(6)-O(19)       | 2.08(2)  |
| Nd(1)-O(19) | 2.384(19) | Zn(6)-N(7)        | 2.14(3)  |
| Nd(1)-O(25) | 2.37(3)   | O(22)-Nd(1)-O(6)  | 85.2(9)  |
| Nd(1)-O(10) | 2.408(18) | O(22)-Nd(1)-O(20) | 143.3(8) |
| Nd(1)-O(9)  | 2.460(17) | O(6)-Nd(1)-O(20)  | 99.3(7)  |
| Nd(1)-C(83) | 3.09(3)   | O(22)-Nd(1)-O(7)  | 135.1(8) |
| Nd(2)-O(15) | 2.31(2)   | O(6)-Nd(1)-O(7)   | 67.2(7)  |
| Nd(2)-O(1)  | 2.335(18) | O(20)-Nd(1)-O(7)  | 78.2(6)  |
| Nd(2)-O(24) | 2.34(2)   | O(22)-Nd(1)-O(19) | 77.8(8)  |
| Nd(2)-O(11) | 2.356(19) | O(6)-Nd(1)-O(19)  | 87.8(7)  |
| Nd(2)-O(14) | 2.43(2)   | O(20)-Nd(1)-O(19) | 66.1(6)  |
| Nd(2)-O(2)  | 2.427(19) | O(7)-Nd(1)-O(19)  | 132.4(7) |
| Nd(2)-O(26) | 2.47(2)   | O(22)-Nd(1)-O(25) | 72.3(9)  |
| Nd(2)-O(12) | 2.52(2)   | O(6)-Nd(1)-O(25)  | 89.6(8)  |
| Zn(1)-O(4)  | 2.01(2)   | O(20)-Nd(1)-O(25) | 143.6(8) |
| Zn(1)-O(23) | 1.99(2)   | O(7)-Nd(1)-O(25)  | 72.8(8)  |
| Zn(1)-O(2)  | 2.033(19) | O(19)-Nd(1)-O(25) | 150.0(8) |
| Zn(1)-N(1)  | 2.06(3)   | O(22)-Nd(1)-O(10) | 80.4(8)  |
| Zn(1)-N(2)  | 2.18(3)   | O(6)-Nd(1)-O(10)  | 162.9(7) |
| Zn(2)-O(11) | 1.94(2)   | O(20)-Nd(1)-O(10) | 87.1(6)  |
| Zn(2)-O(20) | 1.96(2)   | O(7)-Nd(1)-O(10)  | 129.8(7) |
| Zn(2)-O(5)  | 2.024(17) | O(19)-Nd(1)-O(10) | 80.2(7)  |
| Zn(2)-O(4)  | 2.06(2)   | O(25)-Nd(1)-O(10) | 94.7(7)  |
| Zn(3)-O(7)  | 1.97(2)   | O(22)-Nd(1)-O(9)  | 130.1(8) |
| Zn(3)-N(4)  | 1.99(3)   | O(6)-Nd(1)-O(9)   | 133.4(7) |
| Zn(3)-O(5)  | 2.019(17) | O(20)-Nd(1)-O(9)  | 71.0(7)  |
| Zn(3)-O(9)  | 2.056(18) | O(7)-Nd(1)-O(9)   | 66.2(6)  |
| Zn(3)-N(3)  | 2.08(2)   | O(19)-Nd(1)-O(9)  | 124.4(6) |
| Zn(4)-O(14) | 1.96(2)   | O(25)-Nd(1)-O(9)  | 77.3(7)  |
| Zn(4)-O(16) | 2.00(2)   | O(10)-Nd(1)-O(9)  | 63.6(6)  |
| Zn(4)-O(12) | 2.024(19) | O(15)-Nd(2)-O(1)  | 97.5(7)  |
| Zn(4)-N(6)  | 2.03(2)   | O(15)-Nd(2)-O(24) | 81.8(8)  |
| Zn(4)-N(5)  | 2.06(2)   | O(1)-Nd(2)-O(24)  | 142.3(8) |
| Zn(5)-O(10) | 1.907(17) | O(15)-Nd(2)-O(11) | 163.1(7) |
| Zn(5)-O(1)  | 1.965(17) | O(1)-Nd(2)-O(11)  | 90.1(7)  |
| Zn(5)-O(16) | 2.05(2)   | O(24)-Nd(2)-O(11) | 83.0(8)  |
| Zn(5)-O(17) | 2.09(2)   | O(15)-Nd(2)-O(14) | 67.6(8)  |

|                   |           |                   |           |
|-------------------|-----------|-------------------|-----------|
| O(1)-Nd(2)-O(14)  | 82.6(7)   | O(7)-Zn(3)-N(4)   | 138.3(10) |
| O(24)-Nd(2)-O(14) | 129.7(9)  | O(7)-Zn(3)-O(5)   | 108.4(8)  |
| O(11)-Nd(2)-O(14) | 128.6(7)  | N(4)-Zn(3)-O(5)   | 112.6(9)  |
| O(15)-Nd(2)-O(2)  | 88.1(7)   | O(7)-Zn(3)-O(9)   | 81.7(7)   |
| O(1)-Nd(2)-O(2)   | 67.0(7)   | N(4)-Zn(3)-O(9)   | 90.2(9)   |
| O(24)-Nd(2)-O(2)  | 75.3(8)   | O(5)-Zn(3)-O(9)   | 90.2(7)   |
| O(11)-Nd(2)-O(2)  | 80.9(7)   | O(7)-Zn(3)-N(3)   | 89.7(8)   |
| O(14)-Nd(2)-O(2)  | 138.4(8)  | N(4)-Zn(3)-N(3)   | 79.8(10)  |
| O(15)-Nd(2)-O(26) | 96.6(8)   | O(5)-Zn(3)-N(3)   | 116.0(8)  |
| O(1)-Nd(2)-O(26)  | 147.4(7)  | O(9)-Zn(3)-N(3)   | 153.8(9)  |
| O(24)-Nd(2)-O(26) | 69.0(8)   | O(14)-Zn(4)-O(16) | 111.6(10) |
| O(11)-Nd(2)-O(26) | 84.7(8)   | O(14)-Zn(4)-O(12) | 82.3(9)   |
| O(14)-Nd(2)-O(26) | 75.9(8)   | O(16)-Zn(4)-O(12) | 89.5(8)   |
| O(2)-Nd(2)-O(26)  | 142.8(7)  | O(14)-Zn(4)-N(6)  | 86.3(10)  |
| O(15)-Nd(2)-O(12) | 131.3(7)  | O(16)-Zn(4)-N(6)  | 118.3(9)  |
| O(1)-Nd(2)-O(12)  | 72.3(6)   | O(12)-Zn(4)-N(6)  | 152.2(9)  |
| O(24)-Nd(2)-O(12) | 134.8(8)  | O(14)-Zn(4)-N(5)  | 135.2(10) |
| O(11)-Nd(2)-O(12) | 65.4(6)   | O(16)-Zn(4)-N(5)  | 112.3(9)  |
| O(14)-Nd(2)-O(12) | 64.0(7)   | O(12)-Zn(4)-N(5)  | 89.7(9)   |
| O(2)-Nd(2)-O(12)  | 126.3(7)  | N(6)-Zn(4)-N(5)   | 80.7(9)   |
| O(26)-Nd(2)-O(12) | 76.4(7)   | O(10)-Zn(5)-O(1)  | 129.2(8)  |
| O(4)-Zn(1)-O(23)  | 114.5(9)  | O(10)-Zn(5)-O(16) | 116.6(8)  |
| O(4)-Zn(1)-O(2)   | 95.0(8)   | O(1)-Zn(5)-O(16)  | 108.7(9)  |
| O(23)-Zn(1)-O(2)  | 104.4(9)  | O(10)-Zn(5)-O(17) | 100.1(8)  |
| O(4)-Zn(1)-N(1)   | 140.0(10) | O(1)-Zn(5)-O(17)  | 106.4(8)  |
| O(23)-Zn(1)-N(1)  | 102.1(11) | O(16)-Zn(5)-O(17) | 84.1(8)   |
| O(2)-Zn(1)-N(1)   | 90.7(10)  | O(17)-Zn(6)-O(21) | 103.6(9)  |
| O(4)-Zn(1)-N(2)   | 84.6(9)   | O(17)-Zn(6)-N(8)  | 143.0(9)  |
| O(23)-Zn(1)-N(2)  | 94.2(10)  | O(21)-Zn(6)-N(8)  | 110.3(10) |
| O(2)-Zn(1)-N(2)   | 159.6(10) | O(17)-Zn(6)-O(19) | 96.7(8)   |
| N(1)-Zn(1)-N(2)   | 77.0(11)  | O(21)-Zn(6)-O(19) | 106.7(8)  |
| O(11)-Zn(2)-O(20) | 128.2(8)  | N(8)-Zn(6)-O(19)  | 87.6(9)   |
| O(11)-Zn(2)-O(5)  | 113.4(8)  | O(17)-Zn(6)-N(7)  | 85.8(10)  |
| O(20)-Zn(2)-O(5)  | 110.5(8)  | O(21)-Zn(6)-N(7)  | 94.4(10)  |
| O(11)-Zn(2)-O(4)  | 101.7(8)  | N(8)-Zn(6)-N(7)   | 77.4(10)  |
| O(20)-Zn(2)-O(4)  | 109.2(8)  | O(19)-Zn(6)-N(7)  | 157.4(9)  |
| O(5)-Zn(2)-O(4)   | 83.7(8)   |                   |           |

---
